# Supplementary material for: Strain modulated magnetocaloric effect in (111) oriented La0.7Sr0.3MnO3–SrRuO3 superlattices
Source: Royal Society of Chemistry journal article supplement (doi:10.1039/d0nr00620c), 2020-01-01
Supplement: d0nr00620c1.pdf [file d0nr00620c1.pdf]

## Supporting Information

Raman anomaly and magnetic entropy near the magnetic phase transition of (111) oriented  $\text{La}_{0.7}\text{Sr}_{0.3}\text{MnO}_3 - \text{SrRuO}_3$  superlattices.

Roshna S. H.,<sup>1</sup> W. Prellier,<sup>2</sup> and P. Padhan\*<sup>1</sup>

<sup>1</sup>*Department of Physics, Indian Institute of Technology Madras, Chennai 600036, India*

<sup>2</sup>*Laboratoire CRISMAT, CNRS UMR 6508, ENSICAEN, 6 Bd du Marechal Juin, F-14050 Caen Cedex, France*

### AUTHOR INFORMATION :

Corresponding Author :

Padhan@iitm.ac.in

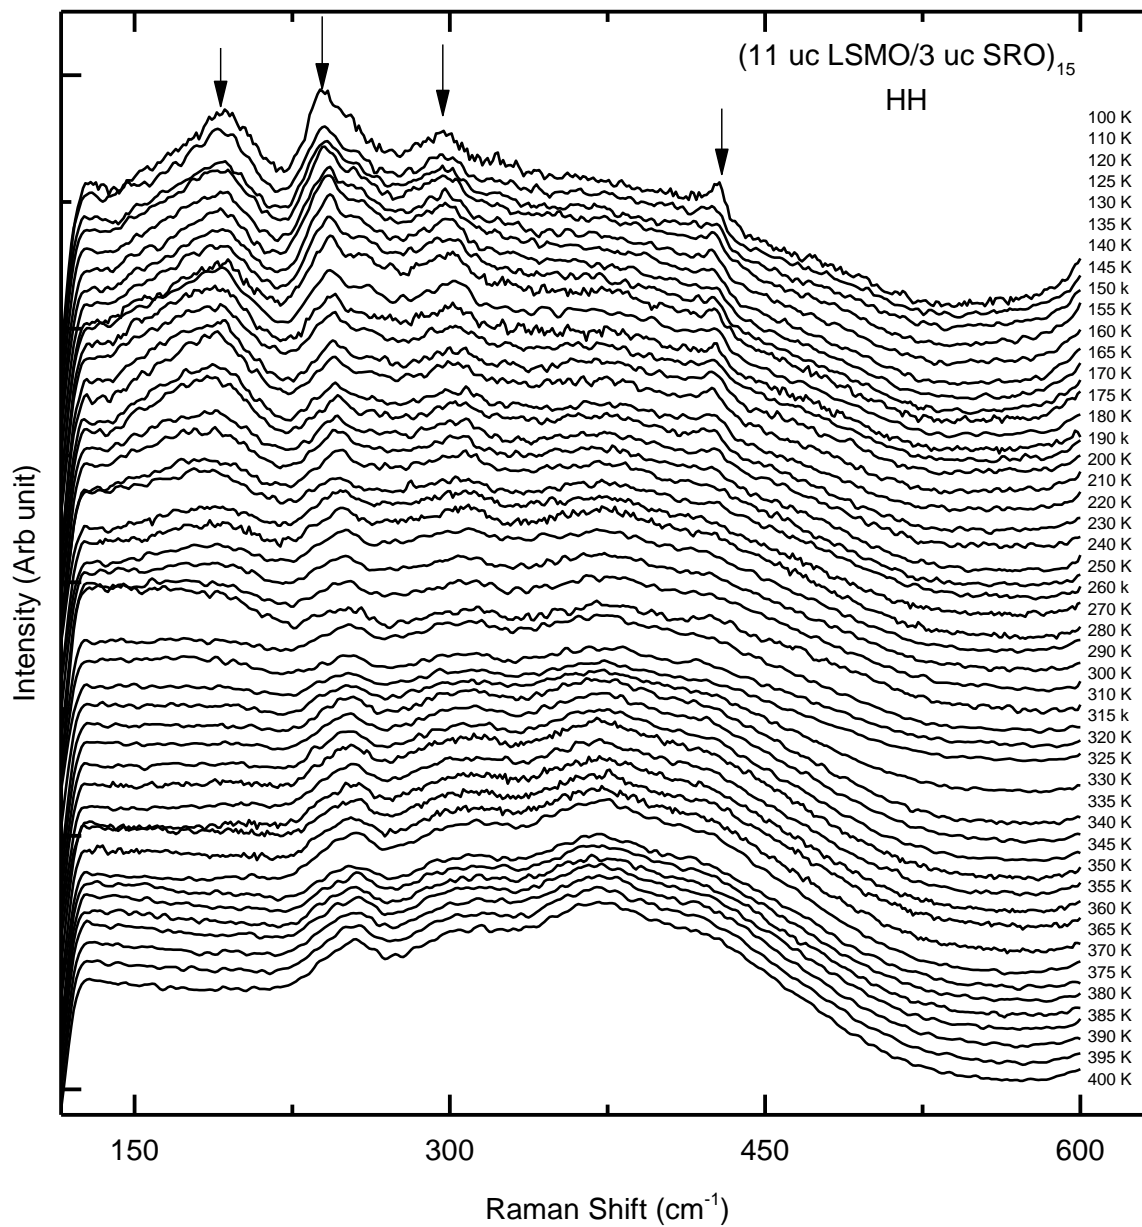

**Figure S1.** Polarized Raman spectra of the (111)STO/[11-u.c. LSMO/3-u.c. SRO]<sub>x15</sub> superlattice measured at various temperatures.

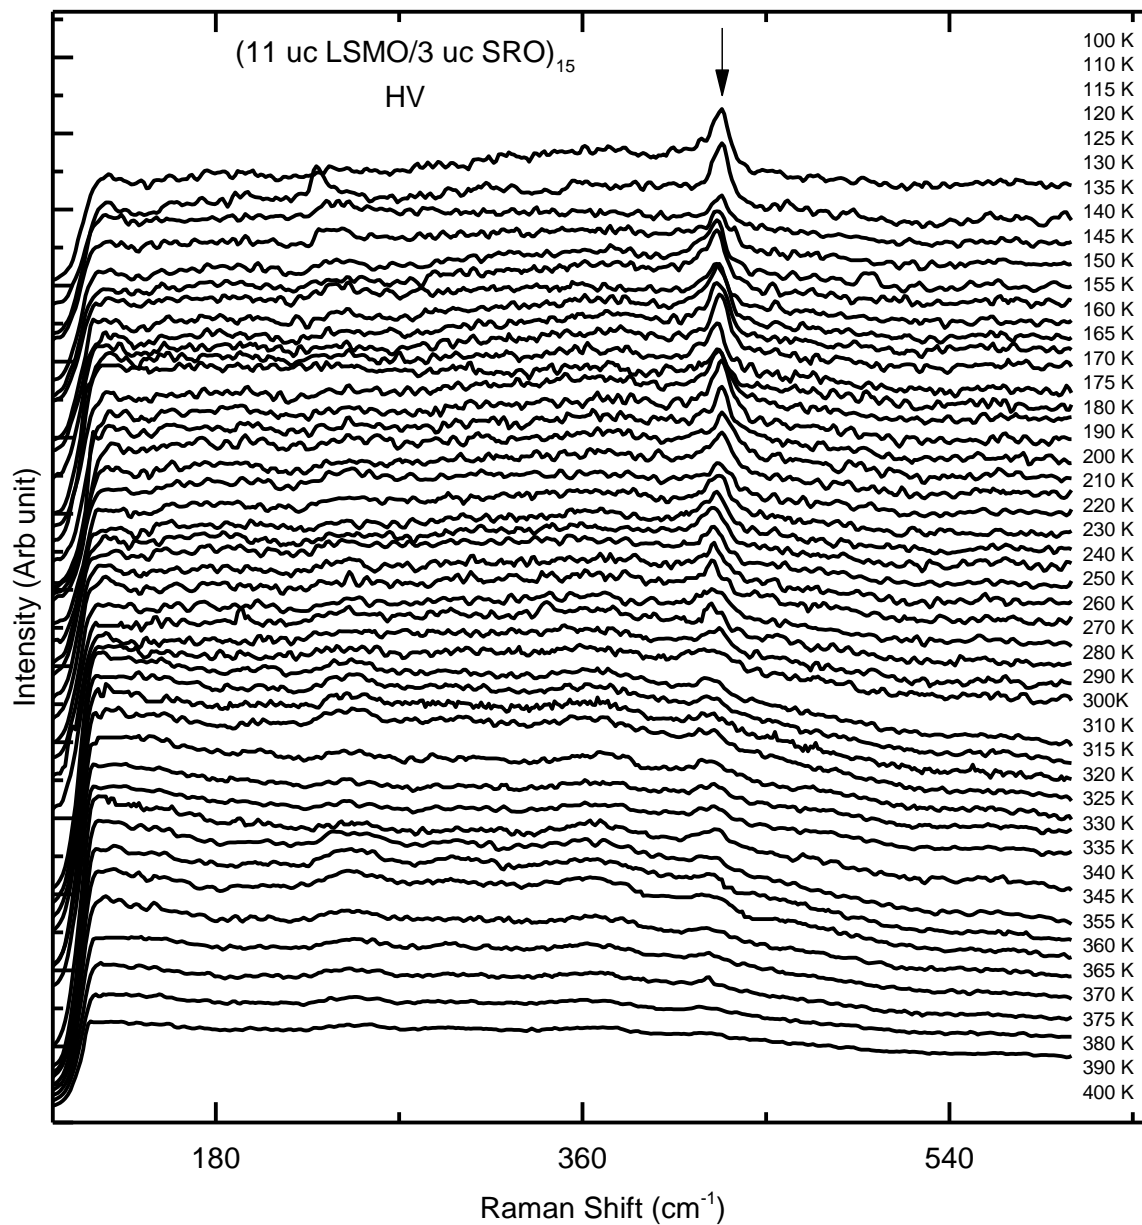

**Figure S2.** Polarized Raman spectra of the  $(111)\text{STO}/[11\text{-u.c. LSMO}/3\text{-u.c. SRO}]_{x15}$  superlattices recorded at different temperatures.

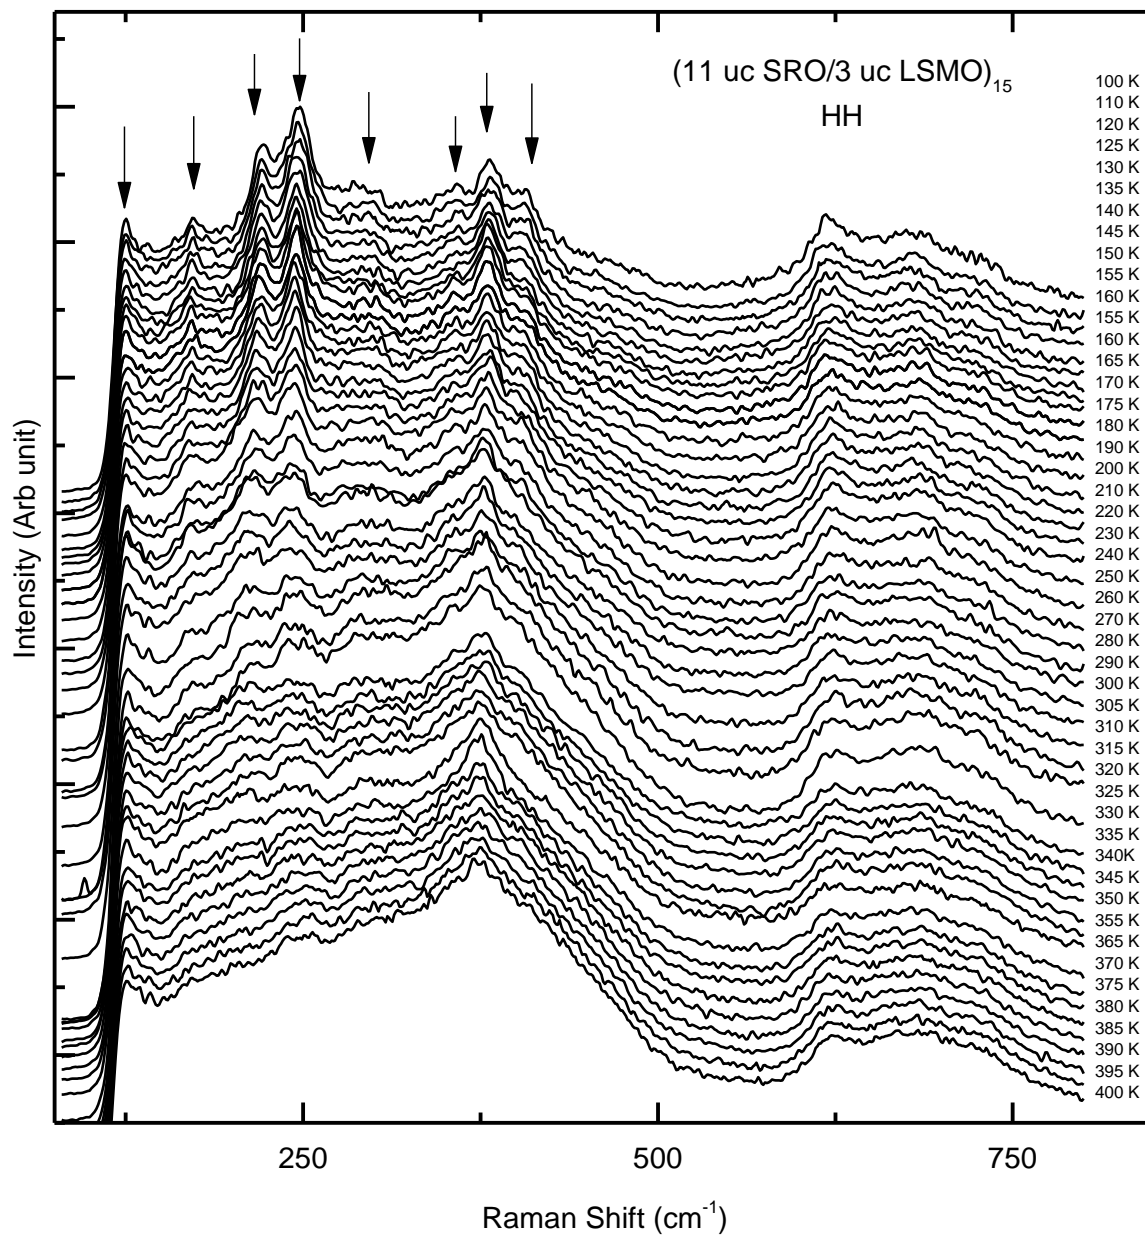

**Figure S3.** Polarized Raman spectra of the (111)STO/[11-u.c. SRO/3-u.c. LSMO]<sub>x15</sub> superlattices recorded at different temperatures.

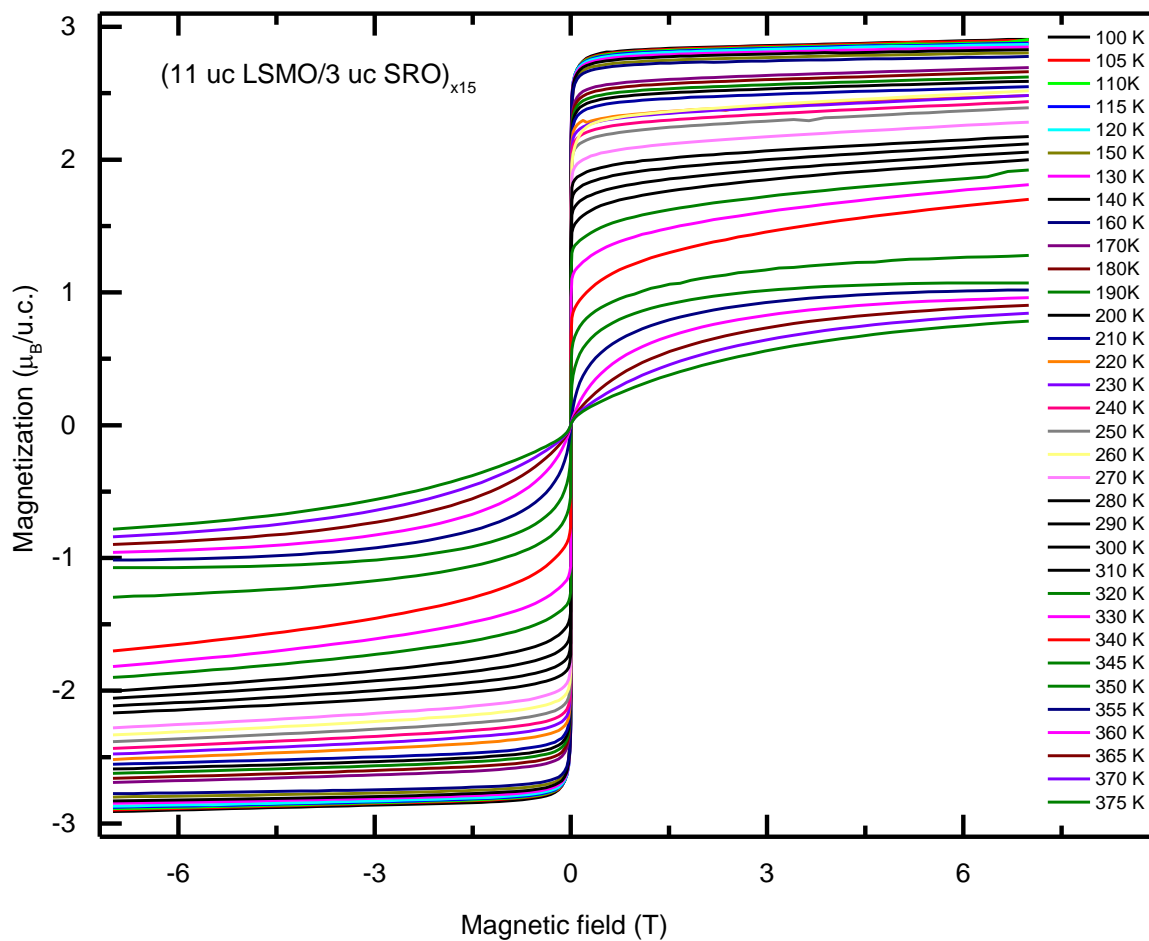

**Figure S4.** Zero-field-cooled field dependent magnetization measured at various temperature of the (111)STO/[11-u.c. LSMO/3-u.c. SRO]<sub>x15</sub> superlattice.

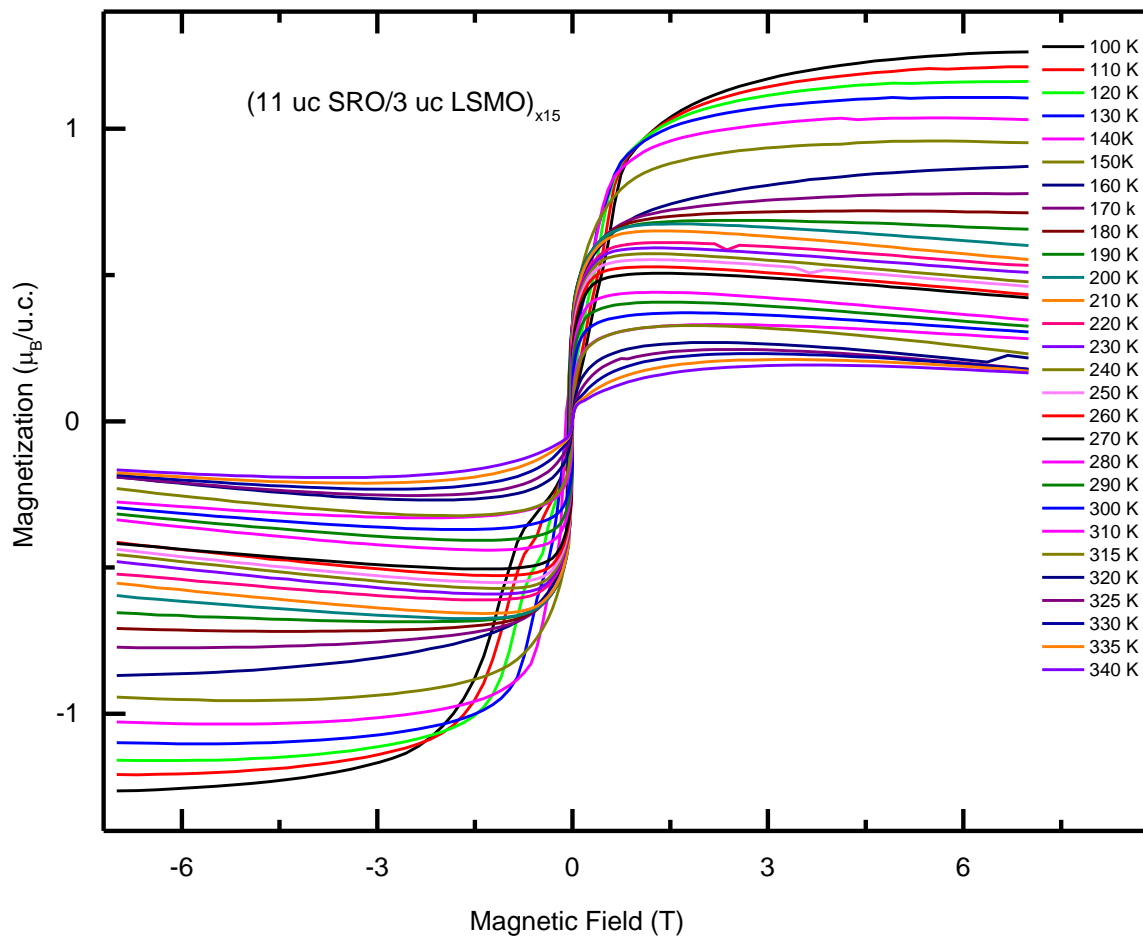

**Figure S5.** Zero-field-cooled field dependent magnetization measured at various temperature of the (111)STO/[11-u.c. SRO/3-u.c. LSMO]<sub>x15</sub> superlattice.
